# Supplementary material for: Alternative translation initiation codons for the plastid maturase MatK: unraveling the pseudogene misconception in the Orchidaceae
Source: PubMed Central journal article supplement (PMC4587860; doi:10.1186/s12862-015-0491-1), 2015-09-29
Supplement: 12862_2015_491_MOESM1_ESM.pdf [file 12862_2015_491_MOESM1_ESM.pdf]

**Additional File 1: Table S1.**

Listing of all species and associated accessions used in the phylogenetic analysis and evolution of the alternative initiation codon. Subfamily and tribe affiliation in the Orchidaceae as well as type of initiation codon required for translation of full-length *matK* ORF are provided.

| Species                                | Subfamily       | Tribe          | Accession Number | Initiation Codon Type <sup>1</sup> |
|----------------------------------------|-----------------|----------------|------------------|------------------------------------|
| <b>ORCHIDACEAE</b>                     |                 |                |                  |                                    |
| <i>Apostasia nipponica</i>             | Apostasioideae  |                | AY557215.1       | cic                                |
| <i>Apostasia nuda</i>                  | Apostasioideae  |                | AY557214.1       | aic                                |
| <i>Apostasia odorata</i> <sup>2</sup>  | Apostasioideae  |                | AY557213.1       | cic                                |
| <i>Apostasia wallichii</i>             | Apostasioideae  |                | AY557212.1       | cic                                |
| <i>Apostasia sp.</i> G244 <sup>2</sup> | Apostasioideae  |                | JN181464.1       | cic                                |
| <i>Neuwiedia borneensis</i>            | Apostasioideae  |                | AY557209.1       | cic                                |
| <i>Neuwiedia veratrifolia</i>          | Apostasioideae  |                | AY557211.1       | cic                                |
| <i>Neuwiedia zollingeri</i>            | Apostasioideae  |                | AY557210.1       | cic                                |
| <i>Cypripedium calceolus</i>           | Cypripedioideae | Cypripedieae   | AY557208.1       | aic                                |
| <i>Paphiopedilum glaucophyllum</i>     | Cypripedioideae | Cypripedieae   | AY557205.1       | aic                                |
| <i>Phragmipedium kovachii</i>          | Cypripedioideae | Phragmipedieae | AY918826.1       | aic                                |
| <i>Selenipedium aequinoctiale</i>      | Cypripedioideae | Selenipedieae  | EF079360.1       | aic                                |
| <i>Bletilla striata</i>                | Epidendroideae  | Arethuseae     | EF079331.1       | aic                                |
| <i>Coelogyne barbata</i>               | Epidendroideae  | Arethuseae     | AF302720.1       | aic                                |
| <i>Entomophobia kinabaluensis</i>      | Epidendroideae  | Arethuseae     | AF302697.1       | aic                                |
| <i>Pleione delavayi</i>                | Epidendroideae  | Arethuseae     | AF503731.1       | aic                                |
| <i>Govenia sp.</i>                     | Epidendroideae  | Calypsoeae     | EF525690.1       | aic                                |
| <i>Chytroglossa aurata</i>             | Epidendroideae  | Cymbidieae     | FJ564753.1       | aic                                |
| <i>Cryptocentrum calcaratum</i>        | Epidendroideae  | Cymbidieae     | DQ210970.1       | cic                                |
| <i>Cuitlauzina candida</i>             | Epidendroideae  | Cymbidieae     | EF079217.1       | aic                                |
| <i>Cymbidium atropurpureum</i>         | Epidendroideae  | Cymbidieae     | AF470465.1       | aic                                |
| <i>Gomesa concolor</i>                 | Epidendroideae  | Cymbidieae     | FJ564816.1       | aic                                |
| <i>Grandiphyllum auriculum</i>         | Epidendroideae  | Cymbidieae     | FJ564947.1       | aic                                |

|                                                                        |                |              |            |     |
|------------------------------------------------------------------------|----------------|--------------|------------|-----|
| <i>Heterotaxis violaceopunctata</i>                                    | Epidendroideae | Cymbidieae   | DQ210678.1 | cic |
| <i>Hofmeisterella eumicroscopia</i>                                    | Epidendroideae | Cymbidieae   | FJ565091.1 | aic |
| <i>Leochilus inconspicuus</i>                                          | Epidendroideae | Cymbidieae   | FJ564943.1 | cic |
| <i>Maxillaria camaridii</i><br>(= <i>Brassia garayana</i> )            | Epidendroideae | Cymbidieae   | DQ210724.1 | cic |
| <i>Miltonioides sp.</i>                                                | Epidendroideae | Cymbidieae   | EF079210.1 | aic |
| <i>Oliveriana brevilabia</i>                                           | Epidendroideae | Cymbidieae   | FJ564814.1 | aic |
| <i>Paphinia seegeri</i>                                                | Epidendroideae | Cymbidieae   | EF079236.1 | aic |
| <i>Pescatoria lehmannii</i>                                            | Epidendroideae | Cymbidieae   | EF079240.1 | aic |
| <i>Raycadenco ecuadorensis</i><br>(= <i>Fernandezia ecuadorensis</i> ) | Epidendroideae | Cymbidieae   | FJ565127.1 | aic |
| <i>Rodriguezia pulchra</i>                                             | Epidendroideae | Cymbidieae   | FJ564960.1 | aic |
| <i>Dendrobium findleyanum</i>                                          | Epidendroideae | Dendrobieae  | EF079348.1 | aic |
| <i>Arpophyllum giganteum</i>                                           | Epidendroideae | Epindendreae | AF265485.1 | aic |
| <i>Bletia catenulata</i>                                               | Epidendroideae | Epindendreae | AY121718.1 | cic |
| <i>Cattleya acklandiae</i>                                             | Epidendroideae | Epindendreae | AF263810.1 | aic |
| <i>Dilomilis montana</i>                                               | Epidendroideae | Epindendreae | AF263765.1 | aic |
| <i>Dimerandra emarginata</i>                                           | Epidendroideae | Epindendreae | AF263784.1 | aic |
| <i>Lanium avicula</i><br>(= <i>Epidendrum avicula</i> )                | Epidendroideae | Epindendreae | AF263778.1 | aic |
| <i>Leptotes bicolor</i>                                                | Epidendroideae | Epindendreae | AF263789.1 | aic |
| <i>Masdevallia pinocchio</i>                                           | Epidendroideae | Epindendreae | AF265445.1 | aic |
| <i>Octomeria gracilis</i>                                              | Epidendroideae | Epindendreae | AF265484.1 | aic |
| <i>Pleurothallis amparoana</i>                                         | Epidendroideae | Epindendreae | AF265467.1 | aic |
| <i>Pseudolaelia vellozicola</i>                                        | Epidendroideae | Epindendreae | AF263776.1 | aic |
| <i>Restrepia aristulifera</i>                                          | Epidendroideae | Epindendreae | AF265481.1 | aic |
| <i>Restrepiopsis striata</i><br>(= <i>Vanda striata</i> )              | Epidendroideae | Epindendreae | AF265480.1 | aic |
| <i>Sophronitis cernus</i>                                              | Epidendroideae | Epindendreae | EF079310.1 | aic |
| <i>Stelis argentata</i>                                                | Epidendroideae | Epindendreae | AF265464.1 | aic |

|                                                                |                |                |            |     |
|----------------------------------------------------------------|----------------|----------------|------------|-----|
| <i>Trisetella scobina</i>                                      | Epidendroideae | Epidendreae    | AF265449.1 | aic |
| <i>Cephalanthera longibracteata</i>                            | Epidendroideae | Neottieae      | HM640666.1 | cic |
| <i>Neottia nidus-avis</i>                                      | Epidendroideae | Neottieae      | EF079303.1 | cic |
| <i>Palmorchis trilobulata</i>                                  | Epidendroideae | Neottieae      | AJ310052.1 | cic |
| <i>Eria javanica</i>                                           | Epidendroideae | Podochileae    | EF079354.1 | aic |
| <i>Thelasis carinata</i>                                       | Epidendroideae | Podochileae    | AY121736.1 | aic |
| <i>Ceratocentron fessellii</i>                                 | Epidendroideae | Vandaeae       | AB217715.1 | aic |
| <i>Micropera pallida</i>                                       | Epidendroideae | Vandaeae       | AB217738.1 | aic |
| <i>Acampe ochracea</i>                                         | Epidendroideae | Vandaeae       | AB217701.1 | aic |
| <i>Aerides krabiensis</i>                                      | Epidendroideae | Vandaeae       | EF655784.2 | aic |
| <i>Cleisomeria pilosulum</i>                                   | Epidendroideae | Vandaeae       | AB217718.1 | aic |
| <i>Hygrochilus parishii</i>                                    | Epidendroideae | Vandaeae       | AB217733.1 | aic |
| <i>Lesliea mirabilis</i><br>(= <i>Phalaenopsis mirabilis</i> ) | Epidendroideae | Vandaeae       | AB217735.1 | aic |
| <i>Phalaenopsis amabilis</i>                                   | Epidendroideae | Vandaeae       | AB217747.1 | aic |
| <i>Pomatocalpa diffusum</i>                                    | Epidendroideae | Vandaeae       | AB217752.1 | aic |
| <i>Sarcoglyphis comberi</i>                                    | Epidendroideae | Vandaeae       | AB217759.1 | aic |
| <i>Trudelia pumila</i><br>(= <i>Vanda pumila</i> )             | Epidendroideae | Vandaeae       | AB217770.1 | aic |
| <i>Aa hartwegii</i>                                            | Orchidoideae   | Cranichideae   | AM900803.1 | aic |
| <i>Chloraea gaudichaudii</i>                                   | Orchidoideae   | Chloraeae      | AJ310004.1 | aic |
| <i>Codonorchis lessonii</i>                                    | Orchidoideae   | Codonorchideae | AJ310008.1 | aic |
| <i>Codonorchis PJK-2001</i>                                    | Orchidoideae   | Codonorchideae | AJ310007.2 | aic |
| <i>Anoectochilus koshunensis</i>                               | Orchidoideae   | Cranichideae   | EU797512.1 | aic |
| <i>Aulosepalum hemichreum</i>                                  | Orchidoideae   | Cranichideae   | AM884247.1 | aic |
| <i>Deiregyne riodelayensis</i>                                 | Orchidoideae   | Cranichideae   | AM884237.1 | aic |
| <i>Eurystyles borealis</i>                                     | Orchidoideae   | Cranichideae   | AJ543925.1 | aic |
| <i>Galeottiella sarcoglossa</i>                                | Orchidoideae   | Cranichideae   | AJ543945.1 | aic |
| <i>Goodyera viridiflora</i>                                    | Orchidoideae   | Cranichideae   | AJ310035.1 | aic |

|                                                                    |              |              |            |     |
|--------------------------------------------------------------------|--------------|--------------|------------|-----|
| <i>Manniella gustavi</i>                                           | Orchidoideae | Cranichideae | AJ543944.1 | aic |
| <i>Pachyplectron arifolium</i>                                     | Orchidoideae | Cranichideae | AJ310051.1 | aic |
| <i>Pterostylis longifolia</i><br>(= <i>Bunochilus longifolia</i> ) | Orchidoideae | Cranichideae | AJ310062.1 | aic |
| <i>Sarcoglottis acaulis</i>                                        | Orchidoideae | Cranichideae | AJ310068.1 | aic |
| <i>Spiranthes praeclara</i>                                        | Orchidoideae | Cranichideae | AJ310073.1 | aic |
| <i>Corycium excisum</i>                                            | Orchidoideae | Diseae       | EU301534.1 | aic |
| <i>Disa glandulosa</i>                                             | Orchidoideae | Diseae       | AJ310021.1 | aic |
| <i>Disperis lindleyana</i>                                         | Orchidoideae | Diseae       | AY370652.1 | aic |
| <i>Pterygodium cleistogamum</i>                                    | Orchidoideae | Diseae       | EU687539.1 | aic |
| <i>Acianthus confusus</i>                                          | Orchidoideae | Diurideae    | AJ309999.1 | aic |
| <i>Adenochilus nortonii</i>                                        | Orchidoideae | Diurideae    | AJ309995.1 | aic |
| <i>Caladenia barbarossa</i>                                        | Orchidoideae | Diurideae    | AJ310026.1 | aic |
| <i>Caleana mJOR</i>                                                | Orchidoideae | Diurideae    | AJ310001.1 | aic |
| <i>Chiloglottis trapeziformis</i>                                  | Orchidoideae | Diurideae    | AJ310003.1 | aic |
| <i>Corybas neocaledonicus</i>                                      | Orchidoideae | Diurideae    | AJ310011.1 | aic |
| <i>Cyanicula gemmata</i>                                           | Orchidoideae | Diurideae    | AJ310017.1 | aic |
| <i>Diuris sulphurea</i>                                            | Orchidoideae | Diurideae    | AJ310024.1 | aic |
| <i>Eriochilus cucullatus</i>                                       | Orchidoideae | Diurideae    | AJ310028.1 | aic |
| <i>Genoplesium fimbriatum</i>                                      | Orchidoideae | Diurideae    | AJ310031.1 | aic |
| <i>Leptoceras menziesii</i>                                        | Orchidoideae | Diurideae    | AJ310039.1 | aic |
| <i>Lyperanthus serratus</i>                                        | Orchidoideae | Diurideae    | AJ310040.1 | aic |
| <i>Megastylis gigas</i>                                            | Orchidoideae | Diurideae    | AJ310042.1 | cic |
| <i>Microtis parviflora</i>                                         | Orchidoideae | Diurideae    | AJ310045.1 | aic |
| <i>Praecoxanthus aphyllus</i>                                      | Orchidoideae | Diurideae    | AJ310057.1 | aic |
| <i>Rimacola elliptica</i>                                          | Orchidoideae | Diurideae    | AJ310066.1 | aic |
| <i>Thelymitra carnea</i>                                           | Orchidoideae | Diurideae    | AJ310076.1 | aic |
| <i>Cleistis rosea</i>                                              | Vanilloideae | Pogonieae    | AJ310006.1 | aic |
| <i>Pogonia ophioglossoidesgi</i>                                   | Vanilloideae | Pogonieae    | AJ310055.1 | aic |

|                                |                 |           |            |     |
|--------------------------------|-----------------|-----------|------------|-----|
| <i>Epistephium sp.</i>         | Vanilloideae    | Vanilleae | EF06502.1  | aic |
| <i>Vanilla planifolia</i>      | Vanilloideae    | Vanilleae | AJ310079.1 | aic |
| <b>OUTGROUP</b>                |                 |           |            |     |
| <i>Milligania stylosa</i>      | Asteliaceae     | -         | HM640649.1 | cic |
| <i>Astelia alpina</i>          | Asteliaceae     | -         | AY368372.1 | cic |
| <i>Blandfordia grandiflora</i> | Blandfordiaceae | -         | JX903609.1 | cic |
| <i>Borya septentrionalis</i>   | Boryaceae       | -         | HM640651.1 | cic |
| <i>Spiloxene serrata</i>       | Hypoxidaceae    | -         | JX903621.1 | cic |
| <i>Hypoxis hemerocallidea</i>  | Hypoxidaceae    | -         | HM640657.1 | cic |
| <i>Lanaria lanata</i>          | Lanariaceae     | -         | AY368376.1 | cic |

---

<sup>1</sup>Initiation codon used for translation of full-length MatK ORF is abbreviated as alternative initiation codon (aic) or consensus initiation codon (cic). The -6 initiation codon used by *Neottia nidus-avis* is noted as the cic as it is in frame with the cic for translation.

<sup>2</sup>Additional species/accessions only used to discern *matK* evolution in the Apostasioideae and were not included in the phylogenetic analysis.
