# Supplementary material for: Alternative translation initiation codons for the plastid maturase MatK: unraveling the pseudogene misconception in the Orchidaceae
Source: PubMed Central journal article supplement (PMC4587860; doi:10.1186/s12862-015-0491-1), 2015-09-29
Supplement: 12862_2015_491_MOESM2_ESM.pdf [file 12862_2015_491_MOESM2_ESM.pdf]

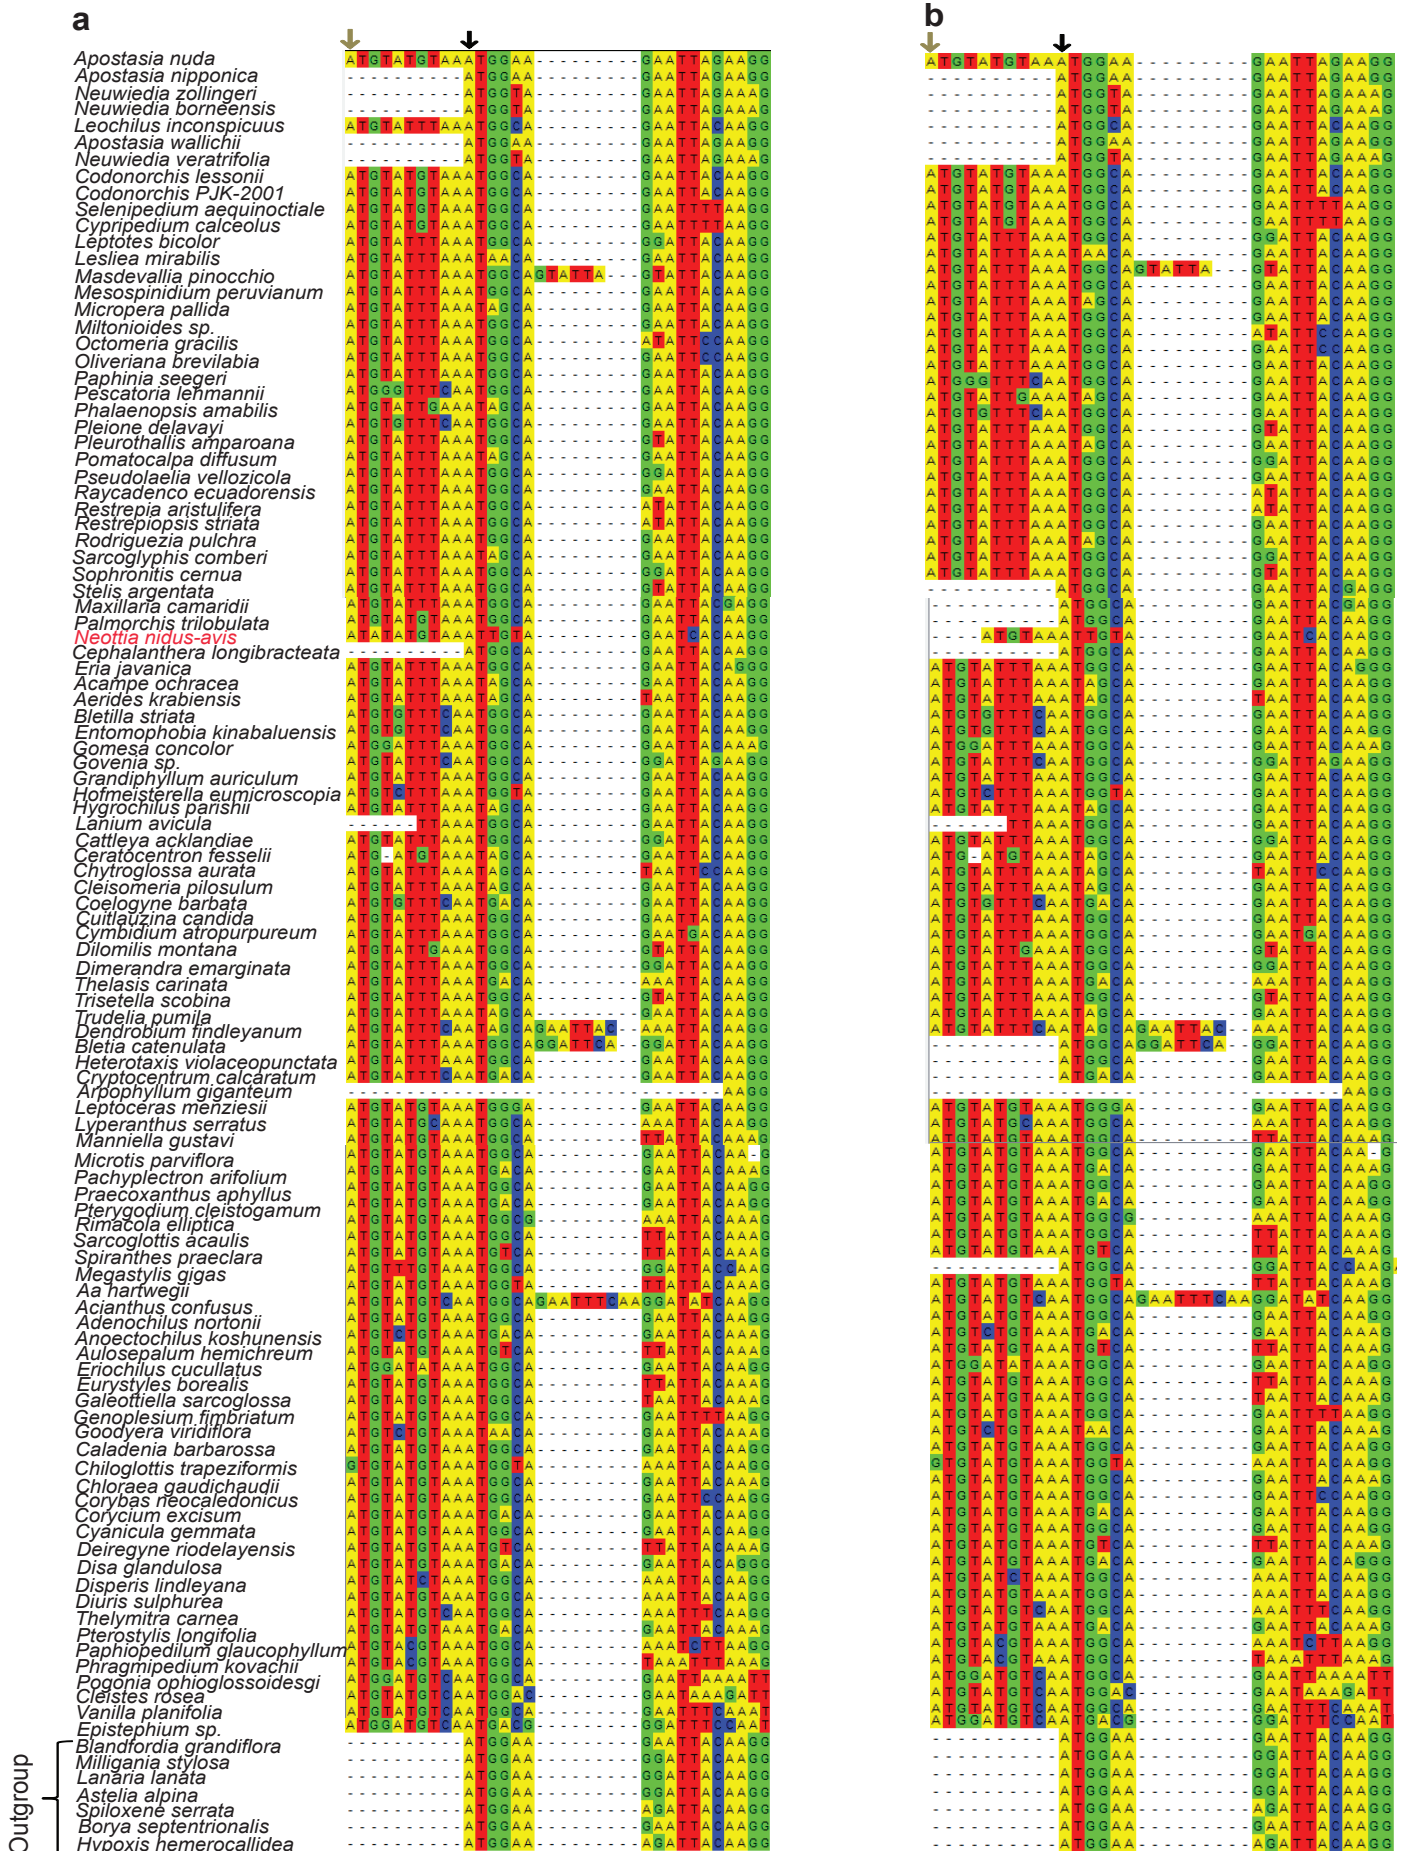

Additional file 2: Figure S1.
