# Supplementary material for: Alternative translation initiation codons for the plastid maturase MatK: unraveling the pseudogene misconception in the Orchidaceae
Source: PubMed Central journal article supplement (PMC4587860; doi:10.1186/s12862-015-0491-1), 2015-09-29
Supplement: 12862_2015_491_MOESM4_ESM.pdf [file 12862_2015_491_MOESM4_ESM.pdf]

[GenBank: KP204599]\* ATG TATTT AAA TGG CAGAA TTA CAAGGATATT - GAGATTG AAAAAAGATAGA aic  
 [GenBank: KP204600]\* ATG TATTT AAA TGG CAGAA TTA CAAGGATATT - GAGATTG AAAAAAGATAGA aic  
 [GenBank: KP204601]\* ATG TATTT AAA TGG CAGAA TTA CAAGGATATT - GAGATTG AAAAAAGATAGA aic  
 [GenBank: KF852707] ATG TATTT AAA TGG CAGAA TTA CAAGGATATT - GAGATTG AAAAAAGATAGA aic  
 [GenBank: KF673844] ATG TATTT AAA TGG CAGAA TTA CAAGGATATT - GAGATTG AAAAAAGATAGA aic  
 [GenBank: KF673843] ATG TATTT AAA TGG CAGAA TTA CAAGGATATT - GAGATTG AAAAAAGATAGA aic  
 [GenBank: EU490700] -----  
 [GenBank: AB040205] ----- ATGGCAGAA TTA CAAGGATATT NTGAGATTG AAAAAAGATAGA cic  
 [GenBank: EF079306] ATG TATTT AAA TGG CAGAA TTA CAAGGCCATTGAGATTG AAAAAAGATAGA cic

**Additional file 4: Figure S3.**
