# Supplementary material for: Alternative translation initiation codons for the plastid maturase MatK: unraveling the pseudogene misconception in the Orchidaceae
Source: PubMed Central journal article supplement (PMC4587860; doi:10.1186/s12862-015-0491-1), 2015-09-29
Supplement: 12862_2015_491_MOESM5_ESM.pdf [file 12862_2015_491_MOESM5_ESM.pdf]

## Additional file 5: Table S2

Source of plant material used in molecular assays.

| <b>Orchid species</b>                           | <b>Source</b>                                                        |
|-------------------------------------------------|----------------------------------------------------------------------|
| <i>Spiranthes vernalis</i>                      | Field collection, Conway, SC,<br>USA (Voucher:<br>CCUMMB0001)        |
| <i>Spiranthes cernua</i> var.<br><i>oderata</i> | Hirt's Garden, private vendor,<br>Granger Township (Medina),<br>Ohio |
| <i>Phaius tancarvilleae</i>                     | Brookgreen gardens,<br>Murrell's Inlet, SC, USA                      |
| <i>Spiranthes sinensis</i>                      | Mount Annan, Royal Botanic<br>Gardens,<br>Sydney, NSW, Australia     |
| <i>Caladenia catenata</i>                       | Mount Annan, Royal Botanic<br>Gardens,<br>Sydney, NSW, Australia     |
| <i>Cryptostylis erecta</i>                      | Mount Annan, Royal Botanic<br>Gardens,<br>Sydney, NSW, Australia     |
| <i>Phaius australis</i>                         | Mount Annan, Royal Botanic<br>Gardens,<br>Sydney, NSW, Australia     |
| <i>Pterostylis saxicola</i>                     | Mount Annan, Royal Botanic<br>Gardens,<br>Sydney, NSW, Australia     |
